# Supplementary material for: Bis(8-hydroxyquinolate-5-sulfonate)zinc intercalated layered double hydroxide and its controllable luminescent properties
Source: Royal Society of Chemistry journal article supplement (doi:10.1039/c0jm01426e), 2010-01-01
Supplement: c0jm01426e.pdf [file c0jm01426e.pdf]

## Supporting Information for

### Bis(8-hydroxyquinolate-5-sulfonate)zinc intercalated layered double hydroxides and its controllable luminescent properties

Shuangde Li, Jun Lu\*, Jing Xu, Sile Dang, David G. Evans, and Xue Duan

*State Key Laboratory of Chemical Resource Engineering, Beijing University of Chemical Technology, Beijing 100029, P. R. China.*

## List of Content

### 1. Structural and compositional characterization of DDS–ZQS(x%)/LDH

**Figure S1.** XRD patterns for DDS–ZQS(x%)/LDH.

**Figure S2.** FT-IR spectra of DDS–ZQS(x%)/LDH.

**Figure S3.** TG/DTA data for ZQS and ZQS(100%)/Mg<sub>2</sub>Al LDH.

### 2. Optical properties of DDS–ZQS(x%)/LDH

**Figure S4.** The UV-vis absorption spectra of DDS–ZQS(x%)/LDH film.

**Figure S5.** The photoluminescence spectra of ZQS solution and crystal.

**Figure S6.** 1931 CIE chromaticity diagram for DDS–ZQS(x%)/Mg<sub>2</sub>Al LDH powder.

**Figure S7.** Fluorescence decay curves and residual plots of fits for DDS–ZQS(x%)/LDH and ZQS film.

**Table S1.** The double-exponential fitting of fluorescence decay data of ZQS and DDS–ZQS(x%)/LDH film.

## 1. Structural and compositional characterization of DDS–ZQS(x%)/LDH

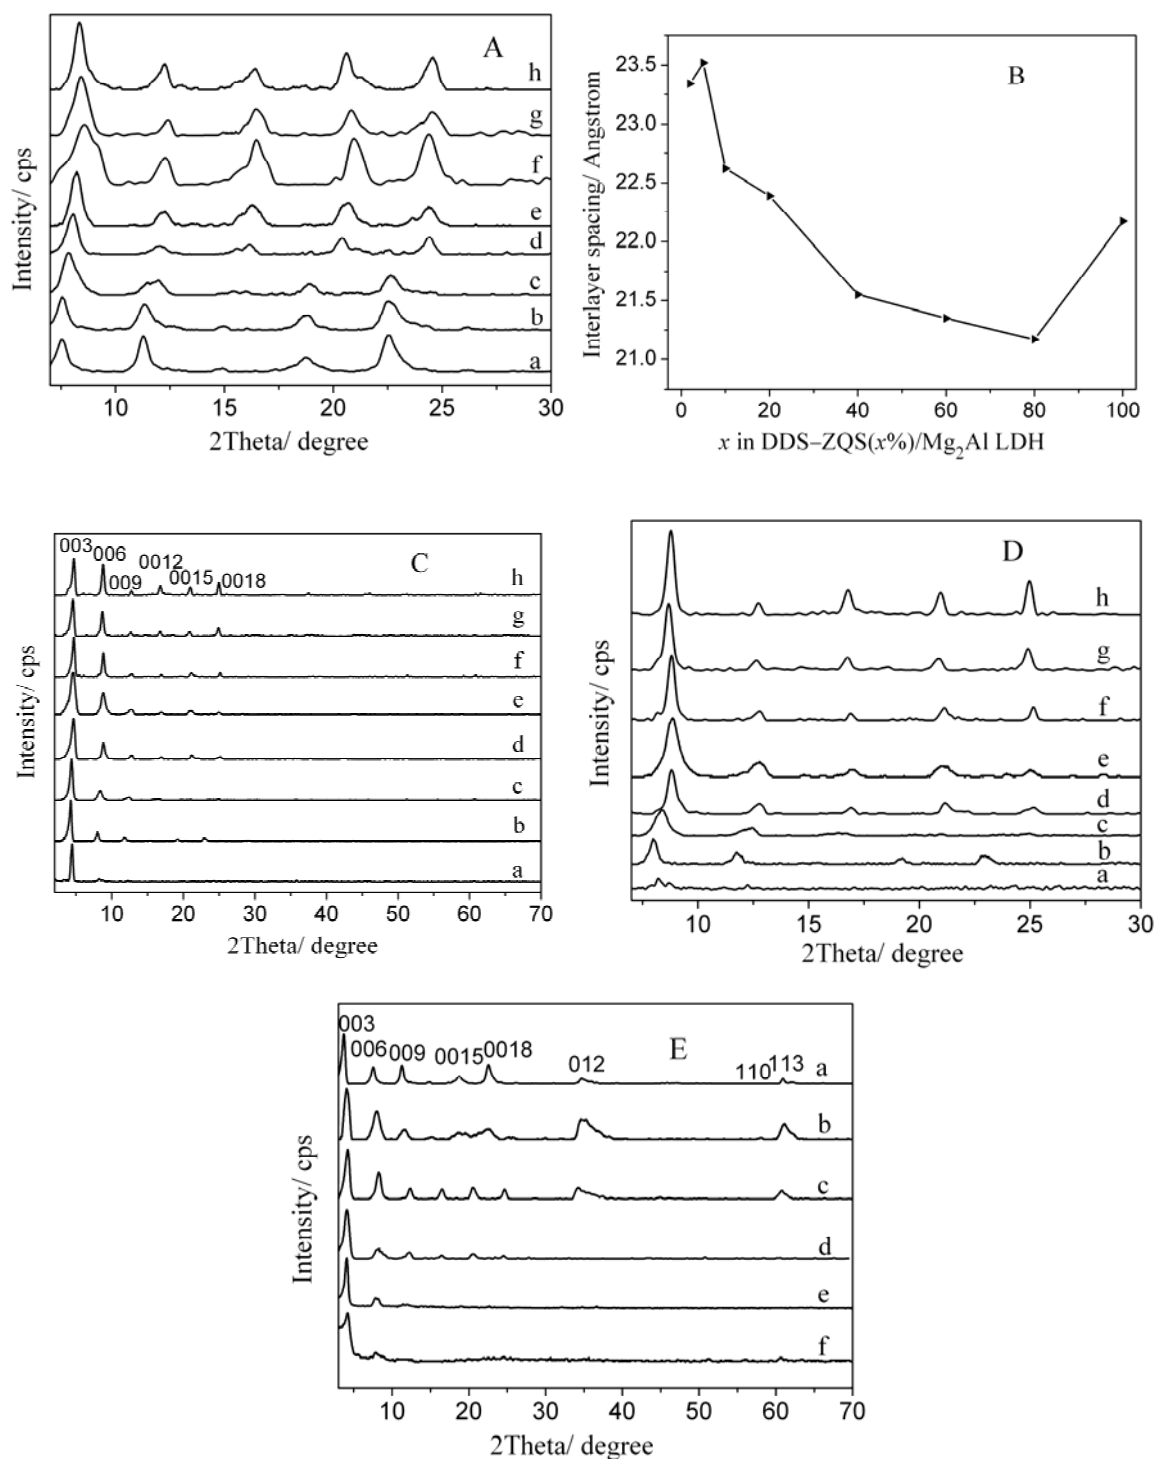

**Figure S1.** A) The XRD patterns of the low angle region for DDS–ZQS(x%)/ Mg<sub>2</sub>Al LDH powder samples; B) The plots of interlayer spacing vs ZQS anions concentration  $x$  in DDS–ZQS(x%)/Mg<sub>2</sub>Al LDH; C) The XRD patterns for the DDS–ZQS(x%)/ Mg<sub>2</sub>Al LDH films and their XRD of low angle region, D): (a–h,  $x = 2, 5, 10, 20, 40, 60, 80, 100$ ), respectively. E) The XRD patterns for powder samples of DDS–ZQS(5%)/M<sub>*n*</sub>Al LDH (a – c: Mg<sub>3</sub>Al, Zn<sub>2</sub>Al, Zn<sub>3</sub>Al) and (d – f) for film samples of (a – c), respectively.

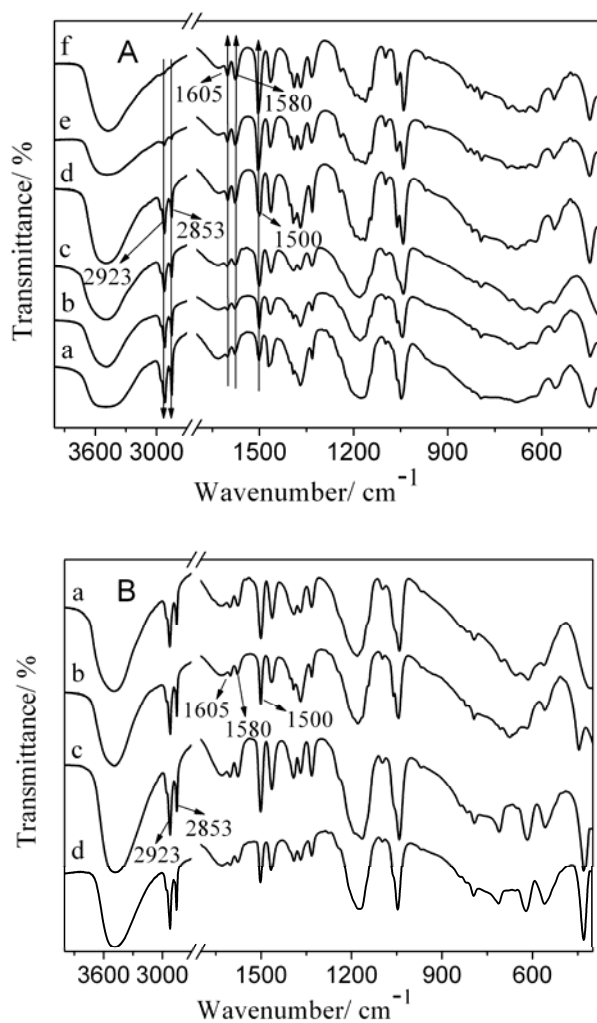

**Figure S2.** FT-IR spectra of A) DDS-ZQS(*x*%)/Mg<sub>2</sub>Al LDH (a – f, *x* = 2, 10, 40, 60, 80, 100). B) (a) DDS-ZQS(5%)/Mg<sub>2</sub>Al LDH, (b) DDS-ZQS(5%)/Mg<sub>3</sub>Al LDH, (c) DDS-ZQS(5%)/Zn<sub>2</sub>Al LDH, (d) DDS-ZQS(5%)/Zn<sub>3</sub>Al LDH.

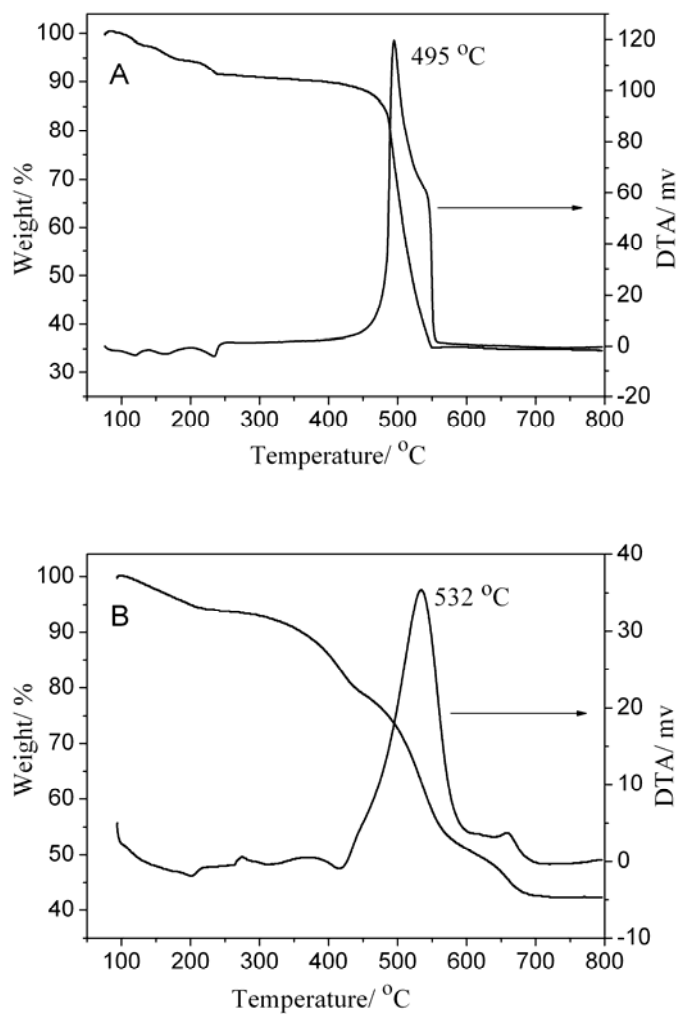

**Figure S3.** TG/DTA data for A) ZQS and B) ZQS(100%)/Mg<sub>2</sub>Al LDH.

## 2. Optical properties of DDS-ZQS(x%)/LDH

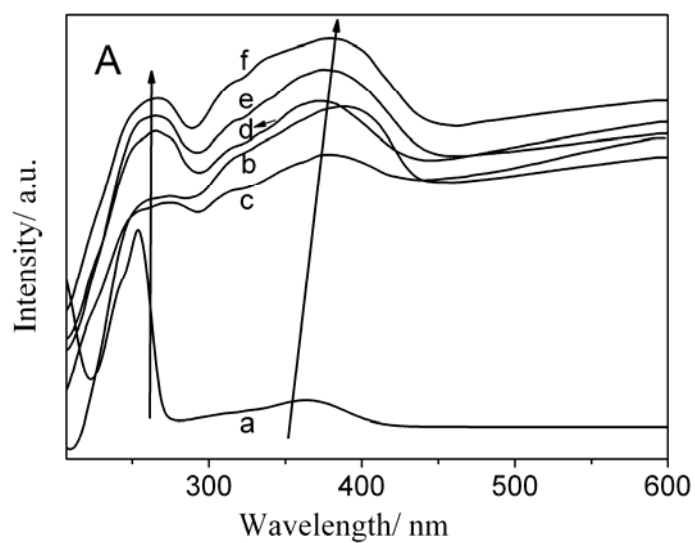

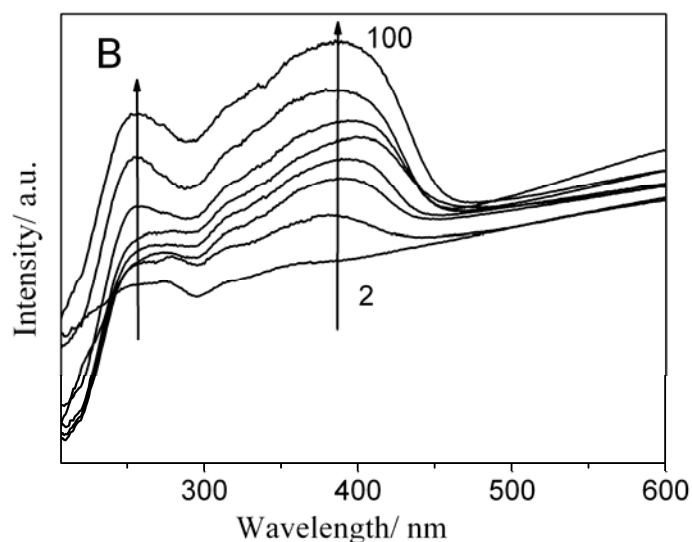

**Figure S4.** The UV-vis absorption spectra of A) (a) ZQS ( $5 \times 10^{-5}$  M) aqueous solution, (b) ZQS crystal, (c) DDS-ZQS(5%)/ $Mg_3Al$  LDH, (d) DDS-ZQS(5%)/  $Mg_2Al$  LDH, (e) DDS-ZQS(5%)/ $Zn_3Al$  LDH, (f) DDS-ZQS(5%)/ $Zn_2Al$  LDH. B) DDS-ZQS(x%) / $Mg_2Al$  LDH film ( $x = 2, 5, 10, 20, 40, 60, 80, 100$ ).

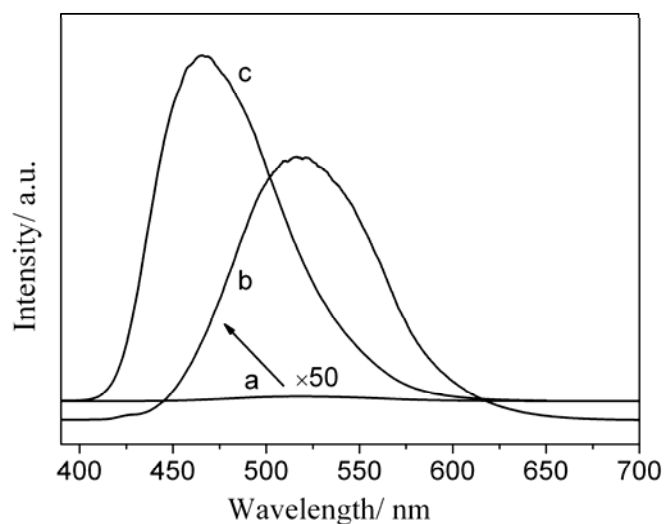

**Figure S5.** The photoluminescence spectra of a) ZQS ( $5 \times 10^{-5}$  M) aqueous solution, b) magnified nearly 50 multiple of curve a, c) ZQS crystal with the excitation at 370 nm.

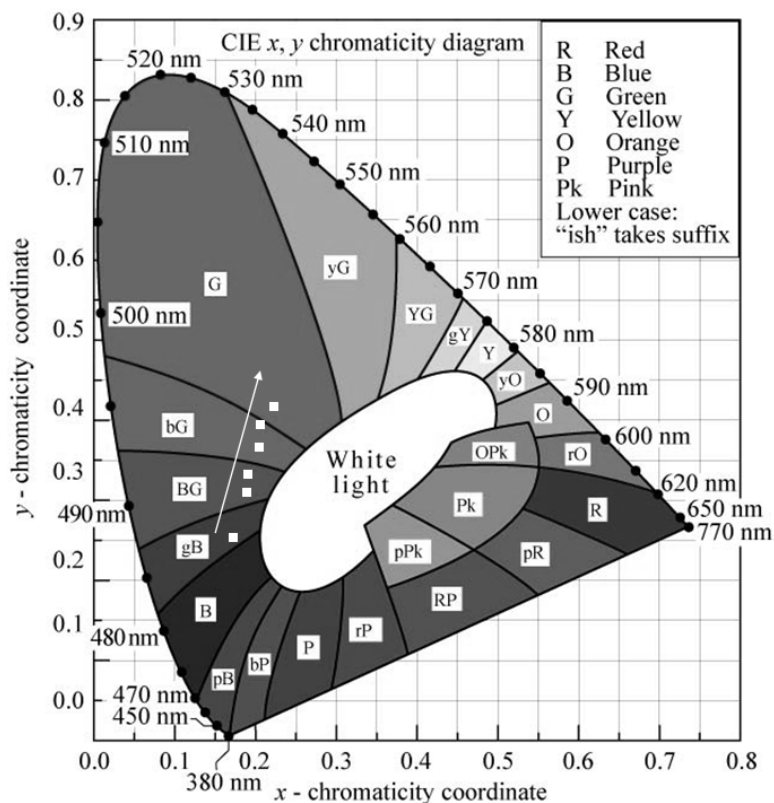

**Figure S6.** 1931 CIE chromaticity diagram for DDS-ZQS( $x\%$ )/Mg<sub>2</sub>Al LDH powder ( $x = 2, 5, 10, 40, 80, 100$ , white square labels were marked with the varied direction indicated by the arrow).

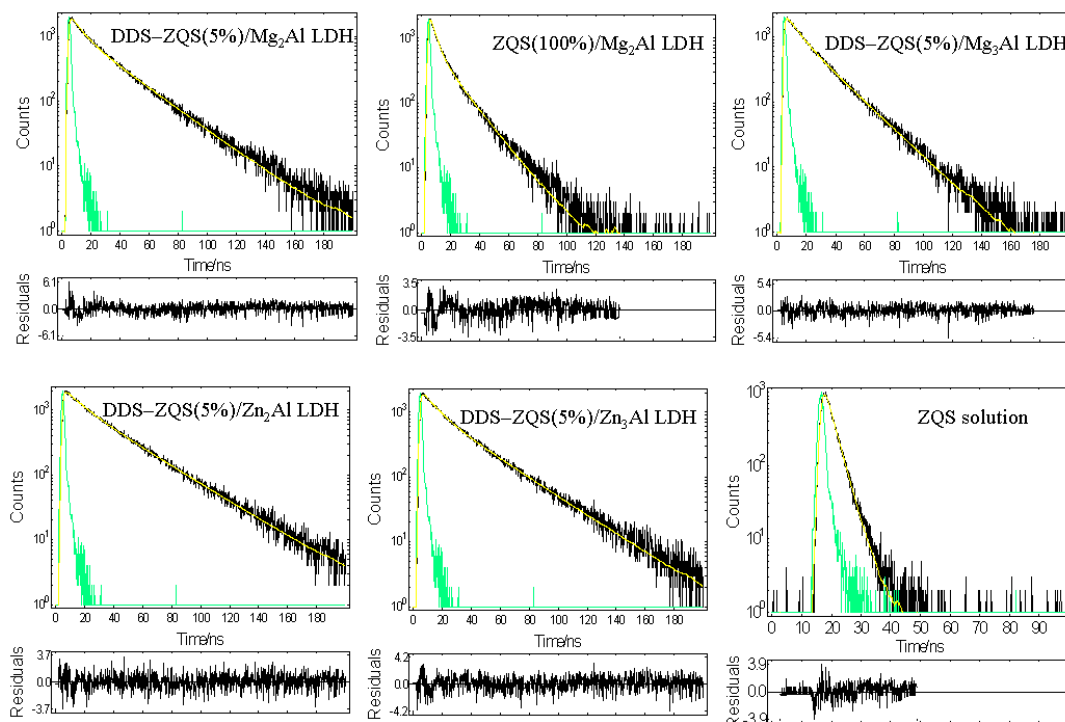

**Figure S7.** Fluorescence decay curves and residual plots of double-exponential fitting for the DDS–ZQS(*x*%)/LDH film samples with varied *x*, and one-exponential fitting for ZQS solution.

**Table S1.** The double-exponential fitting of fluorescence decay data of ZQS and DDS–ZQS(*x*%)/LDH film.

| samples                              | $\tau_i$ (ns) | $A_i$ (%) | $\langle\tau\rangle$ (ns) | $\chi^2$ |
|--------------------------------------|---------------|-----------|---------------------------|----------|
| DDS–ZQS(2%)/Mg <sub>2</sub> Al LDH   | 1.21          | 36.63     | 13.20                     | 1.35     |
|                                      | 20.13         | 63.37     |                           |          |
| DDS–ZQS(5%)/Mg <sub>2</sub> Al LDH   | 7.09          | 19.41     | 22.86                     | 1.23     |
|                                      | 26.66         | 80.59     |                           |          |
| DDS–ZQS(10%)/Mg <sub>2</sub> Al LDH  | 2.06          | 43.26     | 12.38                     | 1.22     |
|                                      | 20.24         | 56.74     |                           |          |
| DDS–ZQS(40%)/Mg <sub>2</sub> Al LDH  | 2.32          | 36.26     | 11.19                     | 1.14     |
|                                      | 18.24         | 56.74     |                           |          |
| DDS–ZQS(80%)/Mg <sub>2</sub> Al LDH  | 2.66          | 30.44     | 11.07                     | 1.18     |
|                                      | 14.75         | 69.56     |                           |          |
| ZQS(100%)/Mg <sub>2</sub> Al LDH     | 3.71          | 41.31     | 10.50                     | 1.22     |
|                                      | 15.28         | 58.69     |                           |          |
| DDS–ZQS(5%)/Mg <sub>3</sub> Al LDH   | 7.49          | 20.35     | 17.98                     | 1.02     |
|                                      | 20.66         | 79.65     |                           |          |
| DDS–ZQS(5%)/Zn <sub>2</sub> Al LDH   | 10.71         | 15.55     | 28.23                     | 1.15     |
|                                      | 31.46         | 84.45     |                           |          |
| DDS–ZQS(5%)/Zn <sub>3</sub> Al LDH   | 9.23          | 22.75     | 25.14                     | 1.26     |
|                                      | 29.83         | 77.25     |                           |          |
| ZQS solution ( $5 \times 10^{-5}$ M) | 2.67          | 100       | 2.67                      | 1.01     |
| ZQS crystal                          | 6.63          | 22.80     | 17.14                     | 1.09     |
|                                      | 20.24         | 77.20     |                           |          |
